# Supplementary material for: Integrative Pathogenicity Assay and Operational Taxonomy-Based Detection of New Forma Specialis of Fusarium oxysporum Causing Datepalm Wilt
Source: MDPI journal article supplement (doi:10.3390/plants11192643), 2022-10-08
Supplement: s1 [file s1]

**Table S1: Primer pairs used for amplification and quantitative detection of target sequences (genes)**

| Target        | Primer Name         | Forward primer sequence (5'→3')  | Reverse primer sequence (5'→3')       | Annealing Temperature | Reference              |
|---------------|---------------------|----------------------------------|---------------------------------------|-----------------------|------------------------|
| <b>PCR</b>    |                     |                                  |                                       |                       |                        |
| ITS           | ITS1-F/ITS4         | CTTGGTCATTTAGAGGAAGTAA           | TCCTCCGCTTATTGATATGC                  | 54°C                  | White et al., 1990     |
| RPBII         | fRPB2-cF/fRPB2-11aR | ATGGG(T/C)AA(A/G)CAAGC(T/C)ATGGG | GC(A/C)TGGATCTT(A/G)TC(A/G)TC(C/G)ACC | 54°C                  | Liu et al., 1999       |
| TEF-1α        | Ef1/ Ef2            | ATGGGTAAGGAAGACAAGAC             | GGAAGTACCAGTGATCATGTT                 | 53°C                  | O'Donnell et al., 1998 |
| IGS           | CNS1/CNL12          | CCAGAGTGCCGATACCGATT             | GCTTAGYGAACAKGGAGTG                   | 56°C                  | Appel and Gordon, 1995 |
| Pg1           | endoF/endoR2        | CCAGAGTGCCGATACCGATT             | GCTTAGYGAACAKGGAGTG                   | 55°C                  | Hirano and Arie, 2009  |
| Pg5           | PG2F/PG2R           | AGATGCAAGGCCGATGATGT             | TCCATGTACTTCTCCTCACC                  | 55°C                  | Hirano and Arie, 2009  |
| Pgx1          | PgxF/PgxR           | TCGTGGGGTAAAGCGTGGT              | TTACTATAGGTCGATCAGCC                  | 57°C                  | Hirano and Arie, 2009  |
| Pgx4          | exoF2/exoR          | TTACTGTCCACGAATGAGAAG            | ACCCCAACCCCCCTCATCT                   | 55°C                  | Hirano and Arie, 2009  |
| SIX1          | F/R                 | ATGGTACTCCTGGCGCCCTC             | TGACAATGCGACCACGCTCG                  | 54°C                  | Meldrum et al. 2012    |
| SIX2          | SIX2F2/ SIX2R2      | CAACGCCGTTTGAATAAGCA             | TCTATCCGCTTTCTTCTCTC                  | 54°C                  | Lievens et al. 2009    |
| SIX3          | SIX3F1/ SIX3R2      | CCAGCCAGAAGGCCAGTTT              | GGCAATTAACCACTCTGCC                   | 54°C                  | Lievens et al. 2009    |
| SIX4          | SIX4F1/ SIX4R1      | TCAGGCTTCACTTAGCATAC             | GCCGACCGAAAAACCTAA                    | 54°C                  | Lievens et al. 2009    |
| SIX5          | SIX5F1/ SIX5R1      | ACACGCTCTACTACTCTTCA             | GAAACCTCAACGCGGCAAA                   | 54°C                  | Lievens et al. 2009    |
| SIX6          | SIX6F1/ SIX6R1      | CTCTCCTGAACCATCAACTT             | CAAGACCAGGTGTAGGCATT                  | 54°C                  | Lievens et al. 2009    |
| SIX7          | SIX7F1/ SIX7R1      | CATCTTTTCGCCGACTTGGT             | CTTAGCACCTTGAGTAACT                   | 54°C                  | Lievens et al. 2009    |
| SIX8          | F/R                 | TCGCCTGCATAACAGGTGCCG            | TTGTGTAGAACTGGACAGTCGATGC             | 55°C                  | Meldrum et al. 2012    |
| SIX9          | F/R                 | CTTCTAGCAGTTGTAGCCAC             | GTACGCCATTGACGCAAG                    | 54°C                  | Laurence et al. 2015   |
| SIX10         | F/R                 | AAAAAGCAGGCTCCATGAAGCTCTTGTTG    | AGAAAGCTGGGTCTACTTAGACCTGGT AATTGTT   | 58°C                  | Laurence et al. 2015   |
| SIX11         | F/R                 | GATGTTCTCCAAAGCCATCC             | AGAATGCCACTCGGTGTGA                   | 54°C                  | Laurence et al. 2015   |
| SIX12         | F/R                 | CTAACGAAGTGAAAAGAAGTCCTC         | GCCTCGCTGGCAAGTATTTGTT                | 54°C                  | Taylor et al. 2016     |
| SIX13         | F/R                 | CCTTCATCATCGACAGTACAACG          | ATCAAACCCGTAACCTCAGCTCC               | 54°C                  | Taylor et al. 2016     |
| SIX14         | F/R                 | TTGCCACCTATGCATACCG              | TCCACATTCTAAGCGAACC                   | 54°C                  | Laurence et al. 2015   |
| <b>RT-PCR</b> |                     |                                  |                                       |                       |                        |
| SIX1          | F/R                 | CCCTCTCAATCCTTGGGTTT             | TGGGATGCTGCCACTTTATC                  |                       | In this study          |
| SIX3          | F/R                 | GCTGATGCCGATTCATCTCT             | GGTGCTGAAGCTCGTAGTAAA                 |                       | In this study          |

|       |     |                        |                        |               |
|-------|-----|------------------------|------------------------|---------------|
| SIX6  | F/R | GTGACCTTGTAGAGTGGAAGAC | CACAATGGTACCCAGATGATGA | In this study |
| SIX7  | F/R | CTTTAGGCCCAACGAAAGGA   | TCCGGTGCCGATACCTAATA   | In this study |
| SIX10 | F/R | AATTGCCGACTCTGGTGTATC  | CTGTATGGCTCGTCTCGTTTAG | In this study |

|                |                                          |
|----------------|------------------------------------------|
| ITS            | Internal Transcribed Spacer              |
| TEF1- $\alpha$ | Translation Elongation Factor 1-alpha    |
| RPBII          | RNA polymerase II second largest subunit |
| IGS            | Intergenic spacer                        |
| Pg1            | Endopolygalacturonase                    |
| Pg5            | Endopolygalacturonase                    |
| Pgx1           | Exopolygalacturonase                     |
| Pgx4           | Exopolygalacturonase                     |
| SIX            | Secreted in xylem                        |
