# Supplementary material for: Integrative Pathogenicity Assay and Operational Taxonomy-Based Detection of New Forma Specialis of Fusarium oxysporum Causing Datepalm Wilt
Source: MDPI journal article supplement (doi:10.3390/plants11192643), 2022-10-08
Supplement: s1 [file s1]

**Supplementary Table S3. A List of *Fusarium oxysporum* forma specialis, used in this study for constructing phylograms**

| Forma Specialis                                     | Isolates/strain | Host      | Country | GenBank Accession Number |          |          |
|-----------------------------------------------------|-----------------|-----------|---------|--------------------------|----------|----------|
|                                                     |                 |           |         | TEF-1alpha               | IGS      | Pgx4     |
| <i>Fusarium oxysporum</i> f.sp. albedinis           | NRRL26622       | Date palm |         | DQ837688                 | -        | -        |
| <i>Fusarium oxysporum</i> f.sp. papaveris           | 811/11IFR       | Poppy     | Italy   | KF301630                 | -        | KC880139 |
| <i>Fusarium oxysporum</i> f.sp. papaveris           | 658/11IFR       | Poppy     | Italy   | KF301631                 | -        | KC880140 |
| <i>Fusarium oxysporum</i> f. sp. opuntiarum         | DB210211-26M    | Insect    | Italy   | KU575889                 | -        | -        |
| <i>Fusarium oxysporum</i> f. sp. opuntiarum         | DB210211-18M    | Insect    | Italy   | KU575886                 | KU575872 | -        |
| <i>Fusarium oxysporum</i> f.sp. opuntiarum          | DB14OTT05 M1    | Insect    | Italy   | KU575882                 | -        | -        |
| <i>Fusarium oxysporum</i> f. sp. cepae              | NRRL22538       | Onion     | USA     | DQ837681                 | DQ831891 | -        |
| <i>Fusarium oxysporum</i> f.sp. cepae               | NRRL 38481      | Onion     | USA     | FJ985399                 | -        | -        |
| <i>Fusarium oxysporum</i> f.sp. lactucae            | BMP1375         | lettuce   | USA     | DQ837673                 | -        | -        |
| <i>Fusarium oxysporum</i> f. sp. lactucae           | BMP1880         | lettuce   | USA     | DQ837670                 | -        | -        |
| <i>Fusarium oxysporum</i> f.sp. lycopersici         | FOLR2           | Tomato    | USA     | DQ837692                 | DQ831894 | -        |
| <i>Fusarium oxysporum</i> f.sp. lycopersici         | OSU451          | Tomato    | USA     | HM057335                 | -        | -        |
| <i>Fusarium oxysporum</i> f. sp. asparagi           | FOA50           | Grass     | Canada  | AY337434                 | -        | -        |
| <i>Fusarium oxysporum</i> f.sp. melonis             | CBS 423.90      | Melon     | Belgium | EF056789                 | -        | -        |
| <i>Fusarium oxysporum</i> f.sp. matthiolae          | NRRL22545       |           | USA     | DQ837682                 | DQ831899 | -        |
| <i>Fusarium oxysporum</i> f.sp. radicis-cucumerinum | strain 30       | Cucumber  | Belgium | EF056781                 | -        | -        |
| <i>Fusarium oxysporum</i> f.sp. radicis-cucumerinum | strain 14       | Cucumber  | Belgium | EF056779                 | -        | -        |
| <i>Fusarium oxysporum</i> f. sp. vasinfectum        | NRRL25231       | Cotton    | USA     | DQ837680                 | DQ831896 | -        |
| <i>Fusarium oxysporum</i> f.sp. radicis lycopersici | CL-06202        | Tomato    | USA     | HM057332                 | -        | -        |
| <i>Fusarium oxysporum</i> f.sp. radicis_lycopersici | CL-0620         | Tomato    | USA     | HM057325                 | -        | -        |
| <i>Fusarium oxysporum</i> f.sp. conglutinans        | NRRL 53158      | Cabbage   | USA     | FJ985443                 | FJ985678 | -        |
| <i>Fusarium oxysporum</i> f.sp. dianthi             | ATCC 64922      | Carnation | Canada  | AY337416                 | -        | -        |
| <i>Fusarium oxysporum</i> f.sp. cepae               | NL106-2         | Onion     | Uruguay | EU220404                 | -        | -        |
| <i>Fusarium oxysporum</i> f.sp. medicaginis         | NRRL22546       | Alfalfa   | USA     | DQ837690                 | -        | -        |
| <i>Fusarium oxysporum</i> f.sp. vasinfectum         | FOV14           | Cotton    | USA     | DQ837695                 | -        | -        |
| <i>Fusarium oxysporum</i> f.sp. melonis             | 0348            | Melon     | USA     | DQ016282                 | -        | -        |
| <i>Fusarium oxysporum</i> f.sp. melonis             | CBS 420.90      | Melon     | Belgium | EF056790                 | -        | -        |
| <i>Fusarium oxysporum</i> f.sp. gladioli            | NRRL 26993      | Gladiolus | Belgium | EF056787                 | -        | -        |
| <i>Fusarium oxysporum</i> f.sp. lili                | Fol-11          | Lily      | Uruguay | EU220403                 | -        | -        |

|                                                     |             |                         |         |          |          |   |
|-----------------------------------------------------|-------------|-------------------------|---------|----------|----------|---|
| <i>Fusarium oxysporum</i> f.sp. <i>lycopersici</i>  | MUCL 22544  | Tomato                  | Belgium | EF056785 | -        | - |
| <i>Fusarium oxysporum</i> f.sp. <i>lycopersici</i>  | MUCL 14159  | Tomato                  | Belgium | EF056784 | -        | - |
| <i>Fusarium oxysporum</i> f.sp. <i>cucumerinum</i>  | ATCC 16416  | Cucumber                | Belgium | EF056783 | -        | - |
| <i>Fusarium oxysporum</i> f.sp. <i>conglutinans</i> | strain 81-4 | Cabbage                 | Belgium | EF056786 | -        | - |
| <i>Fusarium oxysporum</i> f.sp. <i>lilii</i>        | NRRL 28395  | Lily                    | Belgium | EF056788 | -        | - |
| <i>Fusarium oxysporum</i> f.sp. <i>conglutinans</i> | NRRL 53156  | Cabbage                 | USA     | FJ985442 | -        | - |
| <i>Fusarium oxysporum</i> f.sp. <i>raphani</i>      | NRRL 53154  | Radish                  | USA     | FJ985441 | -        | - |
| <i>Fusarium oxysporum</i> f.sp. <i>lactucae</i>     | FK09701     | lettuce                 | USA     | DQ837694 | -        | - |
| <i>Fusarium oxysporum</i> f.sp. <i>lactucae</i>     | F9501       | lettuce                 | USA     | DQ837693 | DQ831893 | - |
| <i>Fusarium oxysporum</i> f.sp. <i>canariensis</i>  | PLM-511A    | Canary Island date palm | USA     | HM591538 | -        | - |
| <i>Fusarium oxysporum</i> f.sp. <i>canariensis</i>  | 4873C       | Canary Island date palm | USA     | FJ895290 | -        | - |
| <i>Fusarium oxysporum</i> f.sp. <i>canariensis</i>  | 2675A       | Canary Island date palm | USA     | FJ895287 | -        | - |
| <i>Fusarium oxysporum</i> f.sp. <i>canariensis</i>  | NRRL 38338  | Canary Island date palm | USA     | FJ985388 | -        | - |
| <i>Fusarium oxysporum</i> f.sp. <i>foetens</i>      | NRRL 38302  | ornamental plant        | USA     | FJ985444 | -        | - |
| <i>Fusarium oxysporum</i> f.sp. <i>cucumerinum</i>  | strain 0016 | Cucumber                | Belgium | EF056760 | -        | - |
| <i>Fusarium oxysporum</i> f.sp. <i>dianthi</i>      | NRRL 26222  | Carnation               | USA     | FJ985284 | -        | - |
| <i>Fusarium oxysporum</i> f.sp. <i>dianthi</i>      | C9-10       | Carnation               | Spain   | GU226828 | -        | - |
| <i>Fusarium oxysporum</i> f.sp. <i>callistephi</i>  | NRRL22536   | Aster                   | USA     | -        | DQ831897 | - |
| <i>Fusarium oxysporum</i> f.sp. <i>callistephi</i>  | NRRL 22536  | Aster                   | -       | -        | FJ985452 | - |

|                                                            |            |                |       |   |          |   |
|------------------------------------------------------------|------------|----------------|-------|---|----------|---|
| <i>Fusarium oxysporum</i> f.sp. <i>narcissi</i>            | Fus113     | Daffodil       | USA   | - | FJ981680 | - |
| <i>Fusarium oxysporum</i> f.sp. <i>matthiolae</i>          | FR-4A/02   | Rocket         | Italy | - | GU001827 | - |
| <i>Fusarium oxysporum</i> f. <i>gladioli</i>               | NRRL 26990 | Gladiolus      | USA   | - | FJ985519 | - |
| <i>Fusarium oxysporum</i> f. sp. <i>fabae</i>              | FV-1/06    | Lamb's lettuce | Italy | - | GQ914754 | - |
| <i>Fusarium oxysporum</i> f.sp. <i>radicis_lycopersici</i> | NRRL 26775 | Tomato         | USA   | - | HM057272 | - |
| <i>Fusarium oxysporum</i> f.sp. <i>lycopersici</i>         | BE1        | Tomato         | USA   | - | HM057278 | - |
| <i>Fusarium oxysporum</i> f.sp. <i>gladioli</i>            | Fus074     | Gladiolus      | USA   | - | FJ981676 | - |
| <i>Fusarium oxysporum</i> f.sp. <i>chrysanthemi</i>        | NRRL 36225 | Chrysanthemum  | USA   | - | FJ985567 | - |
| <i>Fusarium oxysporum</i> f.sp. <i>vasinfectum</i>         | NRRL 38542 | Cotton         | USA   | - | FJ985642 | - |
| <i>Fusarium oxysporum</i> f.sp. <i>vasinfectum</i>         | NRRL 32897 | Cotton         | USA   | - | FJ985551 | - |
| <i>Fusarium oxysporum</i> f.sp. <i>fragariae</i>           | NRRL 26438 | Strawberry     | USA   | - | FJ985503 | - |
| <i>Fusarium oxysporum</i> f. sp. <i>raphani</i>            | FR-0/02    | Rocket         | Italy | - | GU001824 | - |
| - <i>Fusarium oxysporum</i> f.sp. <i>raphani</i>           | Fus055     | Radish         | USA   | - | FJ972807 | - |
| <i>Fusarium oxysporum</i> f.sp. <i>raphani</i>             | FR-33/03A  | Rocket         | Italy | - | GU001854 | - |
| <i>Fusarium oxysporum</i> f.sp <i>cucumerinum</i>          | NRRL 38591 | Cucumber       | USA   | - | FJ985613 | - |
| <i>Fusarium oxysporum</i> f.sp. <i>cucumerinum</i>         | NRRL 26437 | Cucumber       | USA   | - | FJ985502 | - |
| <i>Fusarium oxysporum</i> f.sp. <i>conglutinans</i>        | ATCC 52557 | Cabbage        | Italy | - | GQ914767 | - |
| <i>Fusarium oxysporum</i> f.sp. <i>conglutinans</i>        | ATCC 58385 | Cabbage        | Italy | - | GQ914770 | - |

|                                                      |               |            |       |   |          |          |
|------------------------------------------------------|---------------|------------|-------|---|----------|----------|
| <i>Fusarium oxysporum</i> f.sp. dianthi              | NRRL 28365    | Carnation  | Italy | - | FJ985528 | -        |
| <i>Fusarium oxysporum</i> f.sp. basilici             | NRRL 38318    | Basil Seed | USA   | - | FJ985615 | -        |
| <i>Fusarium oxysporum</i> f.sp. opuntiarum           | 31M           | Insect     | Italy | - | KU575868 | -        |
| <i>Fusarium oxysporum</i> f.sp. opuntiarum           | CBS 743.79    | Insect     | Italy | - | KU575869 | -        |
| <i>Fusarium oxysporum</i> f.sp. opuntiarum           | NRRL28934     | Insect     | USA   | - | DQ831884 | -        |
| <i>Fusarium oxysporum</i> f.sp. opuntiarum           | DB13GIU05-22M | Insect     | Italy | - | KU575870 | -        |
| <i>Fusarium oxysporum</i> f.sp. opuntiarum           | NRRL 28368    | Insect     | Italy | - | FJ985530 | -        |
| <i>Fusarium oxysporum</i> f. sp. lycopersici         | MAFF103041    | Tomato     | Japan | - | -        | -        |
| <i>Fusarium oxysporum</i> f. sp. melonis             | MAFF305544    | Melon      | Japan | - | -        | AB256825 |
| <i>Fusarium oxysporum</i> f. sp. tulipae             | MAFF235109    | Tulip      | Japan | - | -        | -        |
| <i>Fusarium oxysporum</i> f. sp. tulipae             | MAFF235105    | Tulip      | Japan | - | -        | -        |
| - <i>Fusarium oxysporum</i> f. sp. lycopersici       | Saitama ly1   | Tomato     | Japan | - | -        | -        |
| <i>Fusarium oxysporum</i> f. sp. radicis lycopersici | KEF-2R1       | Tomato     | Japan | - | -        | -        |
| <i>Fusarium oxysporum</i> f. sp. dianthi             | MAFF103072    | Carnation  | Japan | - | -        | AB256806 |
| <i>Fusarium oxysporum</i> f. sp. conglutinans        | MAFF744001    | Cabbage    | Japan | - | -        | -        |
| <i>Fusarium oxysporum</i> f. sp. tracheiphilum       | MAFF235726    | Soyabean   | Japan | - | -        | AB256838 |
| <i>Fusarium oxysporum</i> f. sp. raphani             | MAFF103058    | Radish     | Japan | - | -        | AB256833 |
| <i>Fusarium oxysporum</i> f. sp. raphani             | FR-1/05       | Rocket     | Italy | - | GU001860 | -        |
| <i>Fusarium oxysporum</i> f. sp. raphani             | MAFF305124    | Radish     | Japan | - | -        | AB256834 |

|                                               |             |                |       |   |   |          |
|-----------------------------------------------|-------------|----------------|-------|---|---|----------|
| Fusarium oxysporum f. sp. lactucae            | MAFF744028  | Lettuce        | Japan | - | - | AB256811 |
| Fusarium oxysporum f. sp. melongenae          | MAFF103051  | Egg plant      | Japan | - | - | AB256823 |
| Fusarium oxysporum f. sp. melonis             | MAFF305122  | Melon          | Japan | - | - | AB256824 |
| Fusarium oxysporum f. sp. melongenae          | MAFF103051  | Egg plant      | Japan | - | - | -        |
| Fusarium oxysporum f. sp. fragariae           | MAFF727510  | strawberry     | Japan | - | - | AB256809 |
| Fusarium oxysporum f. sp. niveum              | MAFF305543  | Watermelon     | Japan | - | - | AB256826 |
| Fusarium oxysporum f. sp. tracheiphilum       | MAFF235725  | Soyabean       | Japan | - | - | AB256837 |
| Fusarium oxysporum f. sp. spinaciae           | MAFF103059  | Spinach        | Japan | - | - | AB256835 |
| Fusarium oxysporum f. sp. phaseoli            | MAFF235727  | Beans          | Japan | - | - | AB256828 |
| Fusarium oxysporum f. sp. niveum              | NBRC9969    | Watermelon     | Japan | - | - | AB256827 |
| Fusarium oxysporum f. sp. colocasiae          | MAFF744032  | Taro           | Japan | - | - | AB256800 |
| Fusarium oxysporum f. sp. phaseoli            | NBRC9970    | Beans          | Japan | - | - | AB256829 |
| Fusarium oxysporum f. sp. cucumerinum         | MAFF103054  | Cucumber       | Japan | - | - | AB256804 |
| Fusarium oxysporum f. sp. spinaciae           | MAFF731044  | Spinach        | Japan | - | - | AB256836 |
| Fusarium oxysporum f. sp. lagenariae          | MAFF744002  | Calabash gourd | Japan | - | - | AB256814 |
| Fusarium oxysporum f. sp. radicis lycopersici | Saitama rly | Tomato         | Japan | - | - | AB256798 |
| Fusarium oxysporum f. sp. dianthi             | MAFF305946  | Carnation      | Japan | - | - | AB256807 |
| Fusarium oxysporum f. sp. colocasiae          | MAFF744035  | Taro           | Japan | - | - | AB256801 |

|                                                      |             |                         |         |          |   |          |
|------------------------------------------------------|-------------|-------------------------|---------|----------|---|----------|
| <i>Fusarium oxysporum</i> f. sp. <i>lagenariae</i>   | MAFF103008  | Calabash gourd          | Japan   | -        | - | AB256813 |
| <i>Fusarium oxysporum</i> f. sp. <i>lactucae</i>     | MAFF744029  | Lettuce                 | Japan   | -        | - | AB256812 |
| <i>Fusarium oxysporum</i> f. sp. <i>fragariae</i>    | MAFF305557  | Strawberry              | Japan   | -        | - | AB256808 |
| <i>Fusarium oxysporum</i> f. sp. <i>cucumerinum</i>  | MAFF744005  | Cucumber                | Japan   | -        | - | AB256805 |
| <i>Fusarium oxysporum</i> f. sp. <i>conglutinans</i> | MAFF727516  | Cabbage                 | Japan   | -        | - | AB256802 |
| <i>Fusarium oxysporum</i> f. sp. <i>lycopersici</i>  | Saitama ly2 | Tomato                  | Japan   | -        | - | AB256796 |
| <i>Fusarium oxysporum</i> f. sp. <i>glycines</i>     |             | Soybean                 | Belgium | -        | - | FJ790377 |
| <i>Fusarium oxysporum</i> f. sp. <i>cubense</i>      | NRRL 25603  | Banana                  | Belgium | -        | - | FJ790369 |
| <i>Fusarium oxysporum</i> f. sp. <i>cubense</i>      | NRRL 26029  | Banana                  | Belgium | -        | - | FJ790370 |
| <i>Fusarium oxysporum</i> f. <i>cubense</i>          | NRRL 36107  | Banana                  | -       | FJ985326 | - | -        |
| <i>Fusarium oxysporum</i> f. sp. <i>canariensis</i>  | NRRL 26035  | Canary Island date palm | Belgium | -        | - | FJ790368 |
| <i>Fusarium oxysporum</i> f. sp. <i>canariensis</i>  | PLM-385B    | Canary Island date palm | USA     | HM591537 | - | -        |
| <i>Fusarium oxysporum</i> f. sp. <i>perniciosum</i>  | NRRL 22550  | Mimosa                  | Belgium | -        | - | FJ790381 |
| <i>Fusarium oxysporum</i> f. sp. <i>passiflorae</i>  | NRRL 22549  | Passion Fruit           | Belgium | -        | - | FJ790380 |
| <i>Fusarium oxysporum</i> f. sp. <i>batatas</i>      | NRRL 26409  | Sweet potato            | Belgium | -        | - | FJ790367 |
| <i>Fusarium oxysporum</i> f. sp. <i>tuberosi</i>     | NRRL 22555  | Potato                  | Belgium | -        | - | FJ790382 |
| <i>Fusarium oxysporum</i> f. sp. <i>erythroxyli</i>  | NRRL 26574  | Coca                    | Belgium | -        | - | FJ790376 |

| Isolates   | Specimen voucher | Host                            | Substrate | Country  | GenBank Accession Number |          |          |
|------------|------------------|---------------------------------|-----------|----------|--------------------------|----------|----------|
|            |                  |                                 |           |          | TEF1- $\alpha$           | IGS      | Pgx4     |
| Isolate-02 | FMB-FO-PD-005    | Phoenix dactylifera (Date palm) | Fronds    | Pakistan | OP342612                 | OP263620 | OP293334 |
| Isolate-27 | FMB-FO-PD-011    | Phoenix dactylifera (Date palm) | Roots     | Pakistan | OP342613                 | OP263621 | OP293335 |
| Isolate-30 | FMB-FO-PD-017    | Phoenix dactylifera (Date palm) | Roots     | Pakistan | OP342614                 | OP263622 | OP293336 |
| Isolate-59 | FMB-FO-PD-020    | Phoenix dactylifera (Date palm) | Fronds    | Pakistan | OP342615                 | OP263623 | OP293337 |
