# Supplementary material for: Integrative Pathogenicity Assay and Operational Taxonomy-Based Detection of New Forma Specialis of Fusarium oxysporum Causing Datepalm Wilt
Source: MDPI journal article supplement (doi:10.3390/plants11192643), 2022-10-08
Supplement: s1 [file s1]

**Supplementary Table S2: A List of *Fusarium* isolates, and *Fusarium* species, used in this study for constructing phylograms**

| Species/Isolate              | Strain Accession # | GenBank Accession Numbers |                |            | Country                  |
|------------------------------|--------------------|---------------------------|----------------|------------|--------------------------|
|                              |                    | ITS                       | TEF1- $\alpha$ | RPBII      |                          |
| Isolate-02                   | FMB-FO-PD-005      | OM319651.1                | OP342612       | OP234307   | Sindh, Pakistan          |
| Isolate-27                   | FMB-FO-PD-011      | OM327774.1                | OP342613       | OP234308   | Punjab Zone II, Pakistan |
| Isolate-30                   | FMB-FO-PD-017      | OM391976.1                | OP342614       | OP234309   | Punjab Zone I, Pakistan  |
| Isolate-59                   | FMB-FO-PD-020      | OM391977.1                | OP342615       | OP234310   | KPK, Pakistan            |
| <i>Fusarium oxysporum</i>    | CBS132475          | MH866023.1                | KR071771.1     | KU604313.1 | South Africa             |
| <i>Fusarium proliferatum</i> | CBS138981          | KT716199.1                | KT716210       | KT716196.1 | –                        |
| <i>Fusarium proliferatum</i> | CBS184.33          | MH855401.1                | KU604399.1     | KU604244.1 | Guyana                   |
| <i>Fusarium proliferatum</i> | CBS182.32          | MH855271.1                | KU604395.1     | KU604246.1 | USA                      |
| <i>Fusarium zealandicum</i>  | CBS111.93          | NR_138298.1               | HQ728148.1     | HM626684.1 | –                        |
| <i>Fusarium solani</i>       | CBS132898          | KF255440                  | KF255484       | KF255523   | –                        |
| <i>Fusarium falciforme</i>   | CBS135512          | KM401895.1                | KM401894.1     | KM401892.1 | –                        |
| <i>Fusarium falciforme</i>   | CBS132191          | KF255424.1                | KF255467.1     | KF255510.1 | –                        |
| <i>Fusarium solani</i>       | CBS118931          | JX435204.1                | JX435154.1     | JX435254.1 | –                        |
| <i>Fusarium ambrosium</i>    | CBS571.94          | KM231801.1                | KM231929.1     | KM232368.1 | India                    |

|                                    |           |            |            |            |              |
|------------------------------------|-----------|------------|------------|------------|--------------|
| <i>Fusarium neocosmosporiellum</i> | CBS517.71 | KM231804.1 | KM231932.1 | KM232371.1 | India        |
| <i>Fusarium neocosmosporiellum</i> | CBS325.54 | KM231803.1 | KM231931.1 | KM232370.1 | South Africa |
| <i>Fusarium neocosmosporiellum</i> | CBS562.70 | KM231805.1 | KM231933.1 | KM232372.1 | Guinea       |
| <i>Fusarium striatum</i>           | CBS101573 | KM231798.1 | KM231927.1 | KM232365.1 | New Zealand  |
| <i>Fusarium illudens</i>           | CBS119605 | KM231806.1 | KM231935.1 | KM232374.1 | New Zealand  |
| <i>Fusarium phaseoli</i>           | CBS265.50 | KM232375.1 | HE647964.1 | KM232375.1 | USA          |
| <i>Fusarium petroliphilum</i>      | CBS135955 | KR071702.1 | KU711768.1 | KU604337.1 | –            |
| <i>Fusarium globosum</i>           | CBS431.97 | LT746280.1 | LT746232.1 | LT746345.1 | South Africa |
| <i>Fusarium globosum</i>           | CBS429.97 | LT746278.1 | LT746230.1 | LT746343.1 | South Africa |
| <i>Fusarium fujikuroi</i>          | CBS119855 | KR071669.1 | KU711679.1 | KU604260.1 | –            |
| <i>Fusarium fujikuroi</i>          | CBS221.76 | KR071666.1 | KR071741.1 | KU604255.1 | Taiwan       |
| <i>Fusarium acutatum</i>           | CBS402.97 | MH862652.1 | KU604454.1 | KT154005.1 | –            |
| <i>Fusarium incarnatum</i>         | CBS132895 | KF255437.1 | KF255481.1 | KF255546.1 | –            |
| <i>Fusarium equiseti</i>           | CBS30794  | MH862468.1 | KR071777.1 | KU604327.1 | Germany      |

FMB= FMB-Fungal Molecular Biology Laboratory the Culture Collection University of Agriculture Faisalabad,

CBS=CBS-Culture Collection of the Centraalbureau voor Schimmelcultures, Fungal Biodiversity Centre, Utrecht, The Netherlands
